# Supplementary material
Source: MDPI journal article supplement (https://www.mdpi.com/1424-8247/15/1/78)
Supplement: s1 [file s1]

**Title:** A case-control of patients with COVID-19 to explore the association of previous hospitalisation use of medication on the mortality of COVID-19 disease: a Propensity score matching analysis

# Supplementary tables

**Table S1** Propensity score matching analysis of other final drugs. Lower and upper limits of the 95% confidence interval for the Odds Ratio.

| ATC CODE | DRUG<br>P.VALUE | OR   | LOWER LIMIT<br>95% CI | UPPER LIMIT<br>95% CI | POWER |
|----------|-----------------|------|-----------------------|-----------------------|-------|
| A01AB09  | 1.000           | 1.00 | 0.01                  | 78.56                 | 1.000 |
| A01AC53  | 0.250           | 0.00 | 0.00                  | 5.32                  | 0.803 |
| A02AD03  | 0.500           | Inf  | 0.03                  | Inf                   | 0.789 |
| A02AH    | 0.500           | 0.00 | 0.00                  | 39.00                 | 0.789 |
| A02AH91  | NA              | NA   | NA                    | NA                    | NA    |
| A02BA02  | 0.250           | Inf  | 0.19                  | Inf                   | 0.803 |
| A02BA03  | 0.790           | 0.86 | 0.24                  | 2.99                  | 0.797 |
| A02BC    | 0.688           | 1.19 | 0.49                  | 2.94                  | 0.712 |
| A02BC01  | 0.544           | 1.07 | 0.86                  | 1.34                  | 0.613 |
| A02BC02  | 0.579           | 1.11 | 0.76                  | 1.63                  | 0.634 |
| A02BC03  | 0.803           | 0.87 | 0.27                  | 2.77                  | 0.809 |
| A02BC04  | 1.000           | 1.00 | 0.01                  | 78.56                 | 1.000 |
| A02BC05  | 0.420           | 1.41 | 0.58                  | 3.57                  | 0.560 |
| A02BD08  | NA              | NA   | NA                    | NA                    | NA    |
| A02BX    | NA              | NA   | NA                    | NA                    | NA    |
| A02BX91  | 1.000           | 1.00 | 0.01                  | 78.56                 | 1.000 |
| A03AA04  | 0.452           | 2.00 | 0.29                  | 22.23                 | 0.588 |
| A03AA05  | 0.500           | 0.00 | 0.00                  | 39.00                 | 0.789 |
| A03AB06  | 0.500           | 0.00 | 0.00                  | 39.00                 | 0.789 |
| A03AX04  | 0.250           | Inf  | 0.19                  | Inf                   | 0.803 |
| A03AX13  | 0.500           | Inf  | 0.03                  | Inf                   | 0.789 |
| A03BB01  | 0.124           | 0.20 | 0.00                  | 1.79                  | 0.585 |
| A03FA    | 0.625           | 2.00 | 0.10                  | 118.26                | 0.680 |
| A03FA01  | 0.603           | 1.21 | 0.57                  | 2.59                  | 0.651 |
| A03FA03  | 0.627           | 0.78 | 0.24                  | 2.36                  | 0.668 |
| A03FA06  | 0.831           | 1.10 | 0.42                  | 2.91                  | 0.835 |
| A03FA08  | 0.342           | 0.50 | 0.08                  | 2.34                  | 0.552 |
| A03FA51  | NA              | NA   | NA                    | NA                    | NA    |
| A04AD    | 0.753           | 0.80 | 0.16                  | 3.73                  | 0.766 |
| A05AA02  | 0.048           | 0.33 | 0.08                  | 1.09                  | 0.541 |
| A06AA01  | 0.374           | 0.33 | 0.01                  | 4.15                  | 0.586 |
| A06AB02  | 0.500           | 0.00 | 0.00                  | 39.00                 | 0.789 |
| A06AB06  | 0.500           | 0.00 | 0.00                  | 39.00                 | 0.789 |
| A06AC01  | 0.547           | 0.66 | 0.14                  | 2.82                  | 0.622 |
| A06AD11  | 0.605           | 1.34 | 0.40                  | 4.70                  | 0.654 |
| A06AD12  | 0.250           | 0.00 | 0.00                  | 5.32                  | 0.803 |
| A06AD15  | 1.000           | 1.00 | 0.01                  | 78.56                 | 1.000 |
| A06AD65  | 0.708           | 0.86 | 0.38                  | 1.96                  | 0.728 |

|         |       |      |      |        |       |
|---------|-------|------|------|--------|-------|
| A06AG01 | 0.500 | 0.00 | 0.00 | 39.00  | 0.789 |
| A06AG11 | 0.500 | 0.00 | 0.00 | 39.00  | 0.789 |
| A06AX04 | NA    | NA   | NA   | NA     | NA    |
| A07AA02 | 0.478 | 0.70 | 0.22 | 2.04   | 0.585 |
| A07AA11 | 0.625 | 2.00 | 0.10 | 118.26 | 0.680 |
| A07DA03 | 1.000 | 1.00 | 0.01 | 78.56  | 1.000 |
| A07EA06 | NA    | NA   | NA   | NA     | NA    |
| A07EA07 | NA    | NA   | NA   | NA     | NA    |
| A07EC01 | 0.250 | Inf  | 0.19 | Inf    | 0.803 |
| A07EC02 | 0.452 | 0.50 | 0.04 | 3.49   | 0.588 |
| A07FA02 | NA    | NA   | NA   | NA     | NA    |
| A07XA04 | 1.000 | 1.00 | 0.01 | 78.56  | 1.000 |
| A09AA02 | 1.000 | 1.00 | 0.13 | 7.49   | 1.000 |
| A10AB01 | 0.374 | 3.01 | 0.24 | 158.05 | 0.586 |
| A10AB04 | 0.726 | 1.34 | 0.22 | 9.15   | 0.744 |
| A10AB05 | 0.164 | 2.02 | 0.70 | 6.59   | 0.524 |
| A10AB06 | 0.178 | 2.27 | 0.63 | 10.12  | 0.532 |
| A10AC01 | 0.500 | 0.00 | 0.00 | 39.00  | 0.789 |
| A10AD01 | 0.500 | Inf  | 0.03 | Inf    | 0.789 |
| A10AD04 | 0.625 | 2.00 | 0.10 | 118.26 | 0.680 |
| A10AD05 | 1.000 | 1.00 | 0.07 | 13.83  | 1.000 |
| A10AE04 | 0.210 | 1.34 | 0.83 | 2.17   | 0.510 |
| A10AE05 | 0.753 | 0.80 | 0.16 | 3.73   | 0.766 |
| A10AE06 | 0.625 | 0.50 | 0.01 | 9.62   | 0.680 |
| A10BA02 | 0.304 | 0.82 | 0.56 | 1.21   | 0.522 |
| A10BB   | 0.500 | 0.00 | 0.00 | 39.00  | 0.789 |
| A10BB01 | 0.500 | 0.00 | 0.00 | 39.00  | 0.789 |
| A10BB09 | 0.038 | 4.54 | 0.94 | 43.34  | 0.569 |
| A10BB12 | 1.000 | 1.00 | 0.13 | 7.49   | 1.000 |
| A10BD07 | 1.000 | 1.00 | 0.41 | 2.45   | 1.000 |
| A10BD08 | 0.881 | 0.96 | 0.50 | 1.81   | 0.882 |
| A10BD10 | 0.500 | 0.00 | 0.00 | 39.00  | 0.789 |
| A10BD11 | 1.000 | 1.00 | 0.07 | 13.83  | 1.000 |
| A10BD13 | 0.500 | 0.00 | 0.00 | 39.00  | 0.789 |
| A10BD15 | 0.250 | Inf  | 0.19 | Inf    | 0.803 |
| A10BD16 | NA    | NA   | NA   | NA     | NA    |
| A10BD20 | 0.124 | 5.02 | 0.56 | 237.95 | 0.585 |
| A10BF01 | NA    | NA   | NA   | NA     | NA    |
| A10BH01 | 1.000 | 1.00 | 0.27 | 3.76   | 1.000 |
| A10BH02 | 0.141 | 0.45 | 0.12 | 1.42   | 0.528 |
| A10BH03 | 0.500 | Inf  | 0.03 | Inf    | 0.789 |
| A10BH04 | 0.250 | 0.00 | 0.00 | 5.32   | 0.803 |
| A10BJ01 | NA    | NA   | NA   | NA     | NA    |
| A10BJ02 | 1.000 | 1.00 | 0.01 | 78.56  | 1.000 |
| A10BJ03 | 0.500 | 0.00 | 0.00 | 39.00  | 0.789 |
| A10BJ05 | 0.625 | 2.00 | 0.10 | 118.26 | 0.680 |

|         |       |      |      |        |       |
|---------|-------|------|------|--------|-------|
| A10BJ06 | NA    | NA   | NA   | NA     | NA    |
| A10BK01 | 0.225 | 2.35 | 0.53 | 14.12  | 0.539 |
| A10BK02 | 0.500 | Inf  | 0.03 | Inf    | 0.789 |
| A10BK03 | 0.386 | 1.76 | 0.44 | 8.22   | 0.557 |
| A10BX02 | 1.000 | 1.00 | 0.42 | 2.36   | 1.000 |
| A11CA01 | 0.250 | Inf  | 0.19 | Inf    | 0.803 |
| A11CC04 | 0.625 | 0.50 | 0.01 | 9.62   | 0.680 |
| A11CC05 | 0.226 | 1.68 | 0.68 | 4.39   | 0.520 |
| A11CC06 | 0.809 | 0.97 | 0.76 | 1.24   | 0.814 |
| A11DA01 | 0.625 | 2.00 | 0.10 | 118.26 | 0.680 |
| A11DB   | 0.250 | 0.00 | 0.00 | 5.32   | 0.803 |
| A11DB91 | NA    | NA   | NA   | NA     | NA    |
| A11EX   | NA    | NA   | NA   | NA     | NA    |
| A11GA01 | 0.500 | 0.00 | 0.00 | 39.00  | 0.789 |
| A11HA03 | 0.374 | 3.01 | 0.24 | 158.05 | 0.586 |
| A11HA05 | 0.250 | 0.00 | 0.00 | 5.32   | 0.803 |
| A12AA04 | 0.141 | 0.45 | 0.12 | 1.42   | 0.528 |
| A12AA92 | 0.250 | Inf  | 0.19 | Inf    | 0.803 |
| A12AX   | 0.205 | 0.74 | 0.46 | 1.20   | 0.510 |
| A12AX93 | 0.823 | 1.05 | 0.66 | 1.68   | 0.827 |
| A12AX96 | 0.039 | 7.05 | 0.90 | 318.27 | 0.604 |
| A12BA01 | 0.687 | 1.50 | 0.17 | 18.03  | 0.716 |
| A12BA04 | 0.687 | 1.50 | 0.17 | 18.03  | 0.716 |
| A12BA30 | NA    | NA   | NA   | NA     | NA    |
| A12CC30 | 0.687 | 0.67 | 0.06 | 5.83   | 0.716 |
| A12CX91 | 0.250 | Inf  | 0.19 | Inf    | 0.803 |
| A15ZZ91 | 0.500 | Inf  | 0.03 | Inf    | 0.789 |
| B01AA03 | 0.250 | Inf  | 0.19 | Inf    | 0.803 |
| B01AA07 | 0.133 | 1.33 | 0.90 | 1.97   | 0.505 |
| B01AB11 | NA    | NA   | NA   | NA     | NA    |
| B01AC04 | 0.870 | 0.95 | 0.46 | 1.92   | 0.871 |
| B01AC05 | NA    | NA   | NA   | NA     | NA    |
| B01AC18 | 0.452 | 0.50 | 0.04 | 3.49   | 0.588 |
| B01AC22 | NA    | NA   | NA   | NA     | NA    |
| B01AC23 | 0.250 | Inf  | 0.19 | Inf    | 0.803 |
| B01AC24 | 0.125 | 0.00 | 0.00 | 2.42   | 0.820 |
| B01AD01 | 0.500 | 0.00 | 0.00 | 39.00  | 0.789 |
| B01AE07 | 1.000 | 1.00 | 0.27 | 3.76   | 1.000 |
| B01AF01 | 0.158 | 1.69 | 0.78 | 3.82   | 0.514 |
| B01AF02 | 0.576 | 0.85 | 0.47 | 1.54   | 0.633 |
| B01AF03 | 0.605 | 0.75 | 0.21 | 2.47   | 0.654 |
| B01AX05 | NA    | NA   | NA   | NA     | NA    |
| B02AA02 | 0.500 | Inf  | 0.03 | Inf    | 0.789 |
| B03AA01 | 0.044 | 2.04 | 0.97 | 4.51   | 0.518 |
| B03AA07 | 0.897 | 0.97 | 0.56 | 1.67   | 0.898 |
| B03AA91 | NA    | NA   | NA   | NA     | NA    |

|         |       |      |      |       |       |
|---------|-------|------|------|-------|-------|
| B03AB   | 0.179 | 3.02 | 0.54 | 30.65 | 0.551 |
| B03AB09 | 0.422 | 0.62 | 0.16 | 2.17  | 0.565 |
| B03AB91 | 0.500 | 0.00 | 0.00 | 39.00 | 0.789 |
| B03AB92 | 1.000 | 1.00 | 0.01 | 78.56 | 1.000 |
| B03BA01 | 0.110 | 1.49 | 0.89 | 2.54  | 0.507 |
| B03BA51 | 0.579 | 0.71 | 0.18 | 2.62  | 0.639 |
| B05BB91 | 0.250 | 0.00 | 0.00 | 5.32  | 0.803 |
| C01BC03 | NA    | NA   | NA   | NA    | NA    |
| C01BC04 | 1.000 | 1.00 | 0.13 | 7.49  | 1.000 |
| C01BD01 | 1.000 | 1.00 | 0.13 | 7.49  | 1.000 |
| C01BD07 | 1.000 | 1.00 | 0.01 | 78.56 | 1.000 |
| C01CA24 | 0.500 | Inf  | 0.03 | Inf   | 0.789 |
| C01DA02 | 0.876 | 1.05 | 0.54 | 2.07  | 0.877 |
| C01DA14 | 0.178 | 2.27 | 0.63 | 10.12 | 0.532 |
| C01DA52 | 0.866 | 1.06 | 0.51 | 2.21  | 0.868 |
| C01EB15 | 0.500 | 0.00 | 0.00 | 39.00 | 0.789 |
| C01EB17 | 0.031 | Inf  | 0.92 | Inf   | 0.844 |
| C01EB18 | 1.000 | 1.00 | 0.35 | 2.86  | 1.000 |
| C02AC05 | 0.500 | Inf  | 0.03 | Inf   | 0.789 |
| C02CA04 | 0.177 | 1.52 | 0.80 | 2.96  | 0.511 |
| C02DB02 | 0.500 | 0.00 | 0.00 | 39.00 | 0.789 |
| C02DC01 | NA    | NA   | NA   | NA    | NA    |
| C03AA03 | 0.698 | 1.17 | 0.50 | 2.79  | 0.720 |
| C03BA04 | 0.288 | 2.51 | 0.41 | 26.45 | 0.554 |
| C03BA11 | 0.823 | 0.90 | 0.32 | 2.48  | 0.827 |
| C03CA01 | 0.142 | 1.24 | 0.92 | 1.68  | 0.504 |
| C03CA04 | 1.000 | 1.00 | 0.51 | 1.98  | 1.000 |
| C03DA01 | 0.545 | 1.21 | 0.63 | 2.33  | 0.615 |
| C03DA04 | 0.688 | 1.19 | 0.49 | 2.94  | 0.712 |
| C03EA01 | 0.646 | 1.25 | 0.44 | 3.68  | 0.681 |
| C03EA04 | NA    | NA   | NA   | NA    | NA    |
| C04AD03 | 0.208 | 2.01 | 0.62 | 7.55  | 0.528 |
| C05AA01 | NA    | NA   | NA   | NA    | NA    |
| C05AE01 | 0.125 | 0.00 | 0.00 | 2.42  | 0.820 |
| C05AX03 | 0.500 | 0.00 | 0.00 | 39.00 | 0.789 |
| C05BX01 | 0.500 | 0.00 | 0.00 | 39.00 | 0.789 |
| C05CA04 | 0.500 | 0.00 | 0.00 | 39.00 | 0.789 |
| C05CA53 | 0.250 | 0.00 | 0.00 | 5.32  | 0.803 |
| C07AA05 | 0.422 | 0.62 | 0.16 | 2.17  | 0.565 |
| C07AA07 | 0.500 | Inf  | 0.03 | Inf   | 0.789 |
| C07AB02 | 0.065 | 0.25 | 0.03 | 1.25  | 0.563 |
| C07AB03 | 1.000 | 1.00 | 0.52 | 1.91  | 1.000 |
| C07AB07 | 0.373 | 1.16 | 0.83 | 1.61  | 0.538 |
| C07AB12 | 0.625 | 0.50 | 0.01 | 9.62  | 0.680 |
| C07AG02 | 0.058 | 1.70 | 0.95 | 3.11  | 0.510 |
| C07BB07 | NA    | NA   | NA   | NA    | NA    |

|         |       |      |      |        |       |
|---------|-------|------|------|--------|-------|
| C07CB03 | 0.250 | Inf  | 0.19 | Inf    | 0.803 |
| C08CA01 | 0.931 | 0.98 | 0.69 | 1.41   | 0.931 |
| C08CA05 | 0.625 | 2.00 | 0.10 | 118.26 | 0.680 |
| C08CA09 | 0.500 | Inf  | 0.03 | Inf    | 0.789 |
| C08CA11 | 1.000 | 1.00 | 0.19 | 5.39   | 1.000 |
| C08CA12 | 0.288 | 0.40 | 0.04 | 2.44   | 0.554 |
| C08CA13 | 0.813 | 0.89 | 0.30 | 2.61   | 0.819 |
| C08DA01 | 0.687 | 0.67 | 0.06 | 5.83   | 0.716 |
| C08DB01 | 0.386 | 1.76 | 0.44 | 8.22   | 0.557 |
| C09AA01 | 0.062 | 0.00 | 0.00 | 1.51   | 0.833 |
| C09AA02 | 0.370 | 0.87 | 0.64 | 1.19   | 0.537 |
| C09AA03 | 0.813 | 1.13 | 0.38 | 3.38   | 0.819 |
| C09AA04 | 1.000 | 1.00 | 0.13 | 7.49   | 1.000 |
| C09AA05 | 0.753 | 0.80 | 0.16 | 3.73   | 0.766 |
| C09AA06 | 0.500 | Inf  | 0.03 | Inf    | 0.789 |
| C09AA16 | 0.218 | 0.25 | 0.01 | 2.53   | 0.577 |
| C09BA01 | 1.000 | 1.00 | 0.01 | 78.56  | 1.000 |
| C09BA03 | 0.342 | 0.50 | 0.08 | 2.34   | 0.552 |
| C09BA04 | 0.250 | Inf  | 0.19 | Inf    | 0.803 |
| C09BA05 | 1.000 | 1.00 | 0.07 | 13.83  | 1.000 |
| C09BA06 | NA    | NA   | NA   | NA     | NA    |
| C09BB02 | 1.000 | 1.00 | 0.19 | 5.39   | 1.000 |
| C09BB10 | 1.000 | 1.00 | 0.01 | 78.56  | 1.000 |
| C09CA   | 0.250 | 0.00 | 0.00 | 5.32   | 0.803 |
| C09CA01 | 0.683 | 1.12 | 0.63 | 2.00   | 0.707 |
| C09CA02 | 0.250 | Inf  | 0.19 | Inf    | 0.803 |
| C09CA03 | 0.304 | 1.57 | 0.63 | 4.13   | 0.530 |
| C09CA04 | 0.538 | 1.31 | 0.52 | 3.35   | 0.612 |
| C09CA06 | 1.000 | 1.00 | 0.23 | 4.37   | 1.000 |
| C09CA07 | 0.342 | 0.50 | 0.08 | 2.34   | 0.552 |
| C09CA08 | 0.356 | 0.63 | 0.21 | 1.80   | 0.543 |
| C09DA   | 0.125 | Inf  | 0.41 | Inf    | 0.820 |
| C09DA01 | 0.372 | 0.72 | 0.32 | 1.56   | 0.543 |
| C09DA02 | 0.250 | 0.00 | 0.00 | 5.32   | 0.803 |
| C09DA03 | 0.131 | 2.02 | 0.76 | 5.95   | 0.522 |
| C09DA04 | 0.605 | 1.34 | 0.40 | 4.70   | 0.654 |
| C09DA06 | 0.774 | 1.20 | 0.30 | 5.00   | 0.783 |
| C09DA07 | 0.452 | 0.50 | 0.04 | 3.49   | 0.588 |
| C09DA08 | 0.075 | 0.36 | 0.08 | 1.22   | 0.537 |
| C09DB01 | 0.579 | 0.71 | 0.18 | 2.62   | 0.639 |
| C09DB02 | 1.000 | 1.00 | 0.13 | 7.49   | 1.000 |
| C09DB04 | 1.000 | 1.00 | 0.01 | 78.56  | 1.000 |
| C09DX01 | 0.687 | 0.67 | 0.06 | 5.83   | 0.716 |
| C09DX03 | 0.627 | 1.29 | 0.42 | 4.10   | 0.668 |
| C09DX04 | 0.299 | 1.81 | 0.54 | 6.91   | 0.536 |
| C09XA02 | 0.625 | 2.00 | 0.10 | 118.26 | 0.680 |

|         |       |      |      |        |       |
|---------|-------|------|------|--------|-------|
| C10AA01 | 0.873 | 0.97 | 0.70 | 1.35   | 0.874 |
| C10AA02 | 0.507 | 1.67 | 0.32 | 10.80  | 0.604 |
| C10AA03 | 0.813 | 0.89 | 0.30 | 2.61   | 0.819 |
| C10AA04 | 1.000 | 1.00 | 0.07 | 13.83  | 1.000 |
| C10AA07 | 0.740 | 0.89 | 0.43 | 1.83   | 0.754 |
| C10AA08 | 0.646 | 1.25 | 0.44 | 3.68   | 0.681 |
| C10AB02 | 0.500 | 0.00 | 0.00 | 39.00  | 0.789 |
| C10AB04 | 0.687 | 0.67 | 0.06 | 5.83   | 0.716 |
| C10AB05 | 0.113 | 2.19 | 0.77 | 7.06   | 0.525 |
| C10AC01 | 1.000 | 1.00 | 0.13 | 7.49   | 1.000 |
| C10AX06 | 0.605 | 1.34 | 0.40 | 4.70   | 0.654 |
| C10AX09 | 1.000 | 1.00 | 0.39 | 2.56   | 1.000 |
| C10BA02 | 0.342 | 2.01 | 0.43 | 12.46  | 0.552 |
| C10BA03 | 0.625 | 0.50 | 0.01 | 9.62   | 0.680 |
| C10BA05 | 0.042 | 0.41 | 0.14 | 1.04   | 0.528 |
| C10BA06 | 0.108 | 0.28 | 0.03 | 1.50   | 0.557 |
| C10BX03 | 0.250 | Inf  | 0.19 | Inf    | 0.803 |
| C10BX06 | 0.125 | Inf  | 0.41 | Inf    | 0.820 |
| D01AC01 | 0.774 | 1.20 | 0.30 | 5.00   | 0.783 |
| D01AC08 | 0.478 | 0.70 | 0.22 | 2.04   | 0.585 |
| D01AC10 | 0.500 | 0.00 | 0.00 | 39.00  | 0.789 |
| D01AC11 | 0.500 | 0.00 | 0.00 | 39.00  | 0.789 |
| D01AC12 | 0.500 | Inf  | 0.03 | Inf    | 0.789 |
| D01AC14 | 1.000 | 1.00 | 0.01 | 78.56  | 1.000 |
| D01AC52 | 0.500 | Inf  | 0.03 | Inf    | 0.789 |
| D01AE14 | 0.870 | 0.95 | 0.46 | 1.92   | 0.871 |
| D01AE15 | 0.625 | 0.50 | 0.01 | 9.62   | 0.680 |
| D01AE16 | 0.625 | 0.50 | 0.01 | 9.62   | 0.680 |
| D01BA02 | NA    | NA   | NA   | NA     | NA    |
| D03BA52 | 0.374 | 3.01 | 0.24 | 158.05 | 0.586 |
| D05AX02 | 0.500 | 0.00 | 0.00 | 39.00  | 0.789 |
| D05AX52 | 0.034 | 3.71 | 0.97 | 20.78  | 0.554 |
| D05BB02 | 0.250 | Inf  | 0.19 | Inf    | 0.803 |
| D05BX90 | NA    | NA   | NA   | NA     | NA    |
| D06AX01 | 1.000 | 1.00 | 0.07 | 13.83  | 1.000 |
| D06AX04 | NA    | NA   | NA   | NA     | NA    |
| D06AX09 | 0.065 | 0.25 | 0.03 | 1.25   | 0.563 |
| D06BA01 | 0.062 | Inf  | 0.66 | Inf    | 0.833 |
| D06BB10 | NA    | NA   | NA   | NA     | NA    |
| D06BB12 | NA    | NA   | NA   | NA     | NA    |
| D06BX01 | 1.000 | 1.00 | 0.01 | 78.56  | 1.000 |
| D07AA02 | 0.625 | 0.50 | 0.01 | 9.62   | 0.680 |
| D07AB01 | 1.000 | 1.00 | 0.01 | 78.56  | 1.000 |
| D07AB02 | NA    | NA   | NA   | NA     | NA    |
| D07AC01 | 1.000 | 1.00 | 0.27 | 3.76   | 1.000 |
| D07AC04 | NA    | NA   | NA   | NA     | NA    |

|         |       |      |      |        |       |
|---------|-------|------|------|--------|-------|
| D07AC13 | 0.823 | 0.90 | 0.32 | 2.48   | 0.827 |
| D07AC14 | 0.062 | 0.51 | 0.23 | 1.09   | 0.516 |
| D07AC15 | 0.374 | 3.01 | 0.24 | 158.05 | 0.586 |
| D07AC16 | 0.625 | 0.50 | 0.01 | 9.62   | 0.680 |
| D07AC17 | 0.374 | 3.01 | 0.24 | 158.05 | 0.586 |
| D07AC18 | 0.342 | 0.50 | 0.08 | 2.34   | 0.552 |
| D07AD01 | 0.554 | 0.78 | 0.32 | 1.87   | 0.621 |
| D07CA01 | NA    | NA   | NA   | NA     | NA    |
| D07CB01 | NA    | NA   | NA   | NA     | NA    |
| D07CC01 | 0.500 | Inf  | 0.03 | Inf    | 0.789 |
| D07XC01 | 0.625 | 0.50 | 0.01 | 9.62   | 0.680 |
| D09AA09 | 0.500 | Inf  | 0.03 | Inf    | 0.789 |
| D10AF01 | 1.000 | 1.00 | 0.01 | 78.56  | 1.000 |
| D10AF02 | NA    | NA   | NA   | NA     | NA    |
| D10BA01 | NA    | NA   | NA   | NA     | NA    |
| D11AH01 | 1.000 | 1.00 | 0.19 | 5.39   | 1.000 |
| D11AH02 | 0.753 | 0.80 | 0.16 | 3.73   | 0.766 |
| D11AX01 | NA    | NA   | NA   | NA     | NA    |
| D11AX10 | NA    | NA   | NA   | NA     | NA    |
| D11AX18 | 1.000 | 1.00 | 0.19 | 5.39   | 1.000 |
| D11AX22 | NA    | NA   | NA   | NA     | NA    |
| G01AC05 | NA    | NA   | NA   | NA     | NA    |
| G01AF02 | 0.124 | 0.20 | 0.00 | 1.79   | 0.585 |
| G01AF04 | NA    | NA   | NA   | NA     | NA    |
| G01AF12 | NA    | NA   | NA   | NA     | NA    |
| G01AF20 | NA    | NA   | NA   | NA     | NA    |
| G02BB01 | NA    | NA   | NA   | NA     | NA    |
| G02CB03 | NA    | NA   | NA   | NA     | NA    |
| G02CC03 | NA    | NA   | NA   | NA     | NA    |
| G03AA07 | NA    | NA   | NA   | NA     | NA    |
| G03AA09 | NA    | NA   | NA   | NA     | NA    |
| G03AA11 | NA    | NA   | NA   | NA     | NA    |
| G03AA12 | NA    | NA   | NA   | NA     | NA    |
| G03AA13 | NA    | NA   | NA   | NA     | NA    |
| G03AA14 | NA    | NA   | NA   | NA     | NA    |
| G03AA16 | NA    | NA   | NA   | NA     | NA    |
| G03AB08 | NA    | NA   | NA   | NA     | NA    |
| G03AC09 | NA    | NA   | NA   | NA     | NA    |
| G03AD02 | NA    | NA   | NA   | NA     | NA    |
| G03BA03 | 0.500 | Inf  | 0.03 | Inf    | 0.789 |
| G03CA03 | NA    | NA   | NA   | NA     | NA    |
| G03CA04 | NA    | NA   | NA   | NA     | NA    |
| G03CA09 | NA    | NA   | NA   | NA     | NA    |
| G03CX01 | NA    | NA   | NA   | NA     | NA    |
| G03DA02 | NA    | NA   | NA   | NA     | NA    |
| G03DA04 | NA    | NA   | NA   | NA     | NA    |

|         |       |      |      |        |       |
|---------|-------|------|------|--------|-------|
| G03DC02 | NA    | NA   | NA   | NA     | NA    |
| G03FB01 | NA    | NA   | NA   | NA     | NA    |
| G03HA01 | 0.500 | Inf  | 0.03 | Inf    | 0.789 |
| G03HB01 | NA    | NA   | NA   | NA     | NA    |
| G03XC01 | NA    | NA   | NA   | NA     | NA    |
| G03XC02 | NA    | NA   | NA   | NA     | NA    |
| G04BC   | 0.500 | Inf  | 0.03 | Inf    | 0.789 |
| G04BC91 | 0.500 | Inf  | 0.03 | Inf    | 0.789 |
| G04BD04 | 0.500 | Inf  | 0.03 | Inf    | 0.789 |
| G04BD06 | NA    | NA   | NA   | NA     | NA    |
| G04BD07 | 0.452 | 0.50 | 0.04 | 3.49   | 0.588 |
| G04BD08 | 0.386 | 1.76 | 0.44 | 8.22   | 0.557 |
| G04BD09 | 0.500 | Inf  | 0.03 | Inf    | 0.789 |
| G04BD11 | 0.726 | 0.75 | 0.11 | 4.45   | 0.744 |
| G04BD12 | 0.207 | 1.76 | 0.69 | 4.89   | 0.521 |
| G04BE01 | 0.500 | 0.00 | 0.00 | 39.00  | 0.789 |
| G04BE03 | 0.250 | 0.00 | 0.00 | 5.32   | 0.803 |
| G04BE08 | 0.500 | Inf  | 0.03 | Inf    | 0.789 |
| G04BE10 | NA    | NA   | NA   | NA     | NA    |
| G04CA01 | 0.625 | 2.00 | 0.10 | 118.26 | 0.680 |
| G04CA02 | 0.912 | 0.98 | 0.62 | 1.54   | 0.913 |
| G04CA03 | 0.250 | 0.00 | 0.00 | 5.32   | 0.803 |
| G04CA04 | 0.870 | 1.06 | 0.52 | 2.16   | 0.871 |
| G04CA52 | 0.129 | 1.40 | 0.89 | 2.22   | 0.506 |
| G04CA53 | 0.148 | 1.89 | 0.75 | 5.19   | 0.519 |
| G04CB01 | 1.000 | 1.00 | 0.13 | 7.49   | 1.000 |
| G04CB02 | 0.687 | 1.50 | 0.17 | 18.03  | 0.716 |
| G04CX02 | 0.356 | 1.58 | 0.56 | 4.84   | 0.543 |
| G04CX51 | 0.125 | Inf  | 0.41 | Inf    | 0.820 |
| H01BA02 | NA    | NA   | NA   | NA     | NA    |
| H01CB02 | 0.500 | 0.00 | 0.00 | 39.00  | 0.789 |
| H01CB03 | NA    | NA   | NA   | NA     | NA    |
| H02AA02 | 1.000 | 1.00 | 0.01 | 78.56  | 1.000 |
| H02AB01 | NA    | NA   | NA   | NA     | NA    |
| H02AB02 | 0.141 | 2.22 | 0.71 | 8.19   | 0.528 |
| H02AB04 | 0.547 | 0.66 | 0.14 | 2.82   | 0.622 |
| H02AB07 | 0.492 | 1.17 | 0.73 | 1.90   | 0.586 |
| H02AB08 | 0.500 | 0.00 | 0.00 | 39.00  | 0.789 |
| H02AB09 | 1.000 | 1.00 | 0.07 | 13.83  | 1.000 |
| H02AB13 | 1.000 | 1.00 | 0.01 | 78.56  | 1.000 |
| H03AA01 | 0.227 | 0.81 | 0.57 | 1.16   | 0.510 |
| H03BB01 | 0.500 | Inf  | 0.03 | Inf    | 0.789 |
| H03BB02 | 1.000 | 1.00 | 0.13 | 7.49   | 1.000 |
| H03CA   | NA    | NA   | NA   | NA     | NA    |
| H03CA91 | NA    | NA   | NA   | NA     | NA    |
| H04AA01 | 0.726 | 1.34 | 0.22 | 9.15   | 0.744 |



|         |       |      |      |        |       |
|---------|-------|------|------|--------|-------|
| H05AA02 | 0.625 | 2.00 | 0.10 | 118.26 | 0.680 |
| H05BA01 | NA    | NA   | NA   | NA     | NA    |
| H05BX02 | 0.507 | 1.67 | 0.32 | 10.80  | 0.604 |
| J01AA02 | 0.500 | 0.00 | 0.00 | 39.00  | 0.789 |
| J01AA08 | 0.500 | 0.00 | 0.00 | 39.00  | 0.789 |
| J01CA04 | 0.858 | 0.94 | 0.43 | 2.04   | 0.861 |
| J01CE02 | NA    | NA   | NA   | NA     | NA    |
| J01CF02 | 0.218 | 0.25 | 0.01 | 2.53   | 0.577 |
| J01CR02 | 0.074 | 0.58 | 0.29 | 1.10   | 0.512 |
| J01DB05 | 0.500 | 0.00 | 0.00 | 39.00  | 0.789 |
| J01DD08 | 0.299 | 0.55 | 0.14 | 1.85   | 0.536 |
| J01DD16 | 0.386 | 1.76 | 0.44 | 8.22   | 0.557 |
| J01EE01 | 0.605 | 1.34 | 0.40 | 4.70   | 0.654 |
| J01FA09 | 0.125 | 0.00 | 0.00 | 2.42   | 0.820 |
| J01FF01 | 1.000 | 1.00 | 0.07 | 13.83  | 1.000 |
| J01GB03 | 0.500 | 0.00 | 0.00 | 39.00  | 0.789 |
| J01MA02 | 0.131 | 0.50 | 0.17 | 1.32   | 0.522 |
| J01MA06 | 1.000 | 1.00 | 0.01 | 78.56  | 1.000 |
| J01MA12 | 0.133 | 0.66 | 0.36 | 1.17   | 0.509 |
| J01MA14 | 0.374 | 0.33 | 0.01 | 4.15   | 0.586 |
| J01XE01 | 0.726 | 1.34 | 0.22 | 9.15   | 0.744 |
| J01XX01 | 0.646 | 0.87 | 0.45 | 1.67   | 0.680 |
| J02AC01 | 0.452 | 0.50 | 0.04 | 3.49   | 0.588 |
| J02AC02 | 0.500 | 0.00 | 0.00 | 39.00  | 0.789 |
| J04AB02 | NA    | NA   | NA   | NA     | NA    |
| J04AC51 | NA    | NA   | NA   | NA     | NA    |
| J05AB01 | 1.000 | 1.00 | 0.13 | 7.49   | 1.000 |
| J05AB11 | 0.625 | 0.50 | 0.01 | 9.62   | 0.680 |
| J05AH02 | 0.500 | 0.00 | 0.00 | 39.00  | 0.789 |
| L01BA01 | 1.000 | 1.00 | 0.01 | 78.56  | 1.000 |
| L01BC52 | 0.625 | 0.50 | 0.01 | 9.62   | 0.680 |
| L01XX05 | 0.625 | 0.50 | 0.01 | 9.62   | 0.680 |
| L02AB01 | 1.000 | 1.00 | 0.01 | 78.56  | 1.000 |
| L02AE02 | 0.145 | 0.37 | 0.06 | 1.56   | 0.540 |
| L02AE03 | 0.500 | 0.00 | 0.00 | 39.00  | 0.789 |
| L02AE04 | 0.753 | 0.80 | 0.16 | 3.73   | 0.766 |
| L02BA01 | 0.500 | 0.00 | 0.00 | 39.00  | 0.789 |
| L02BA03 | 0.500 | Inf  | 0.03 | Inf    | 0.789 |
| L02BB03 | 1.000 | 1.00 | 0.07 | 13.83  | 1.000 |
| L02BG03 | 0.250 | Inf  | 0.19 | Inf    | 0.803 |
| L02BG04 | 0.452 | 0.50 | 0.04 | 3.49   | 0.588 |
| L02BG06 | NA    | NA   | NA   | NA     | NA    |
| L04AA06 | 0.125 | Inf  | 0.41 | Inf    | 0.820 |
| L04AA10 | NA    | NA   | NA   | NA     | NA    |
| L04AA13 | 0.125 | 0.00 | 0.00 | 2.42   | 0.820 |
| L04AA18 | 0.218 | 4.01 | 0.40 | 197.95 | 0.577 |

|         |       |      |      |        |       |
|---------|-------|------|------|--------|-------|
| L04AD01 | 0.500 | 0.00 | 0.00 | 39.00  | 0.789 |
| L04AD02 | 0.008 | Inf  | 1.45 | Inf    | 0.861 |
| L04AX01 | 0.452 | 2.00 | 0.29 | 22.23  | 0.588 |
| L04AX03 | 0.235 | 1.85 | 0.62 | 6.12   | 0.526 |
| M01AB01 | NA    | NA   | NA   | NA     | NA    |
| M01AB05 | 0.625 | 2.00 | 0.10 | 118.26 | 0.680 |
| M01AB16 | 0.625 | 0.50 | 0.01 | 9.62   | 0.680 |
| M01AB55 | NA    | NA   | NA   | NA     | NA    |
| M01AC05 | 0.500 | 0.00 | 0.00 | 39.00  | 0.789 |
| M01AC06 | 0.500 | 0.00 | 0.00 | 39.00  | 0.789 |
| M01AE01 | 0.314 | 0.74 | 0.40 | 1.37   | 0.527 |
| M01AE02 | 0.547 | 0.66 | 0.14 | 2.82   | 0.622 |
| M01AE03 | NA    | NA   | NA   | NA     | NA    |
| M01AE14 | NA    | NA   | NA   | NA     | NA    |
| M01AE17 | 0.040 | 0.35 | 0.10 | 1.04   | 0.536 |
| M01AE52 | 0.500 | 0.00 | 0.00 | 39.00  | 0.789 |
| M01AG01 | NA    | NA   | NA   | NA     | NA    |
| M01AH01 | 0.374 | 3.01 | 0.24 | 158.05 | 0.586 |
| M01AH05 | 0.687 | 1.50 | 0.17 | 18.03  | 0.716 |
| M01AX02 | NA    | NA   | NA   | NA     | NA    |
| M01AX05 | 0.250 | 0.00 | 0.00 | 5.32   | 0.803 |
| M01AX21 | 0.500 | 0.00 | 0.00 | 39.00  | 0.789 |
| M01AX25 | 0.075 | 0.36 | 0.08 | 1.22   | 0.537 |
| M01CX   | 0.250 | 0.00 | 0.00 | 5.32   | 0.803 |
| M02AA15 | NA    | NA   | NA   | NA     | NA    |
| M02AA28 | 0.500 | 0.00 | 0.00 | 39.00  | 0.789 |
| M03BA03 | 0.500 | Inf  | 0.03 | Inf    | 0.789 |
| M03BX01 | 0.288 | 0.40 | 0.04 | 2.44   | 0.554 |
| M03BX02 | 0.500 | Inf  | 0.03 | Inf    | 0.789 |
| M03BX08 | 0.125 | 0.00 | 0.00 | 2.42   | 0.820 |
| M04AA03 | 0.288 | 2.51 | 0.41 | 26.45  | 0.554 |
| M04AC51 | 0.125 | Inf  | 0.41 | Inf    | 0.820 |
| M05BA04 | 0.579 | 0.71 | 0.18 | 2.62   | 0.639 |
| M05BA06 | 1.000 | 1.00 | 0.13 | 7.49   | 1.000 |
| M05BA07 | 0.547 | 1.50 | 0.35 | 7.28   | 0.622 |
| M05BB03 | 0.625 | 2.00 | 0.10 | 118.26 | 0.680 |
| M05BX04 | 0.866 | 1.06 | 0.51 | 2.21   | 0.868 |
| N01BA02 | NA    | NA   | NA   | NA     | NA    |
| N01BB02 | 0.625 | 0.50 | 0.01 | 9.62   | 0.680 |
| N01BB20 | 0.687 | 1.50 | 0.17 | 18.03  | 0.716 |
| N01BX04 | 0.452 | 2.00 | 0.29 | 22.23  | 0.588 |
| N02AA01 | 0.145 | 2.68 | 0.64 | 15.78  | 0.540 |
| N02AA05 | 0.500 | Inf  | 0.03 | Inf    | 0.789 |
| N02AA55 | 0.726 | 1.34 | 0.22 | 9.15   | 0.744 |
| N02AB03 | 0.050 | 2.28 | 0.94 | 6.11   | 0.524 |
| N02AE01 | 0.374 | 0.33 | 0.01 | 4.15   | 0.586 |

|         |       |      |      |        |       |
|---------|-------|------|------|--------|-------|
| N02AJ06 | 0.062 | 0.43 | 0.15 | 1.12   | 0.525 |
| N02AJ07 | 0.500 | 0.00 | 0.00 | 39.00  | 0.789 |
| N02AJ08 | NA    | NA   | NA   | NA     | NA    |
| N02AJ13 | 0.200 | 0.77 | 0.51 | 1.16   | 0.508 |
| N02AJ14 | 0.500 | 0.00 | 0.00 | 39.00  | 0.789 |
| N02AX02 | 0.740 | 1.12 | 0.55 | 2.32   | 0.754 |
| N02AX06 | 0.790 | 0.86 | 0.24 | 2.99   | 0.797 |
| N02BA01 | 0.500 | Inf  | 0.03 | Inf    | 0.789 |
| N02BB   | 0.288 | 0.40 | 0.04 | 2.44   | 0.554 |
| N02BB02 | 0.806 | 1.03 | 0.80 | 1.32   | 0.812 |
| N02BE01 | 0.448 | 1.09 | 0.87 | 1.35   | 0.565 |
| N02BG91 | 0.500 | 0.00 | 0.00 | 39.00  | 0.789 |
| N02CA52 | 0.625 | 0.50 | 0.01 | 9.62   | 0.680 |
| N02CC01 | NA    | NA   | NA   | NA     | NA    |
| N02CC03 | 1.000 | 1.00 | 0.01 | 78.56  | 1.000 |
| N02CC04 | 0.500 | 0.00 | 0.00 | 39.00  | 0.789 |
| N02CC05 | 0.500 | 0.00 | 0.00 | 39.00  | 0.789 |
| N02CC06 | NA    | NA   | NA   | NA     | NA    |
| N03AA02 | 0.374 | 3.01 | 0.24 | 158.05 | 0.586 |
| N03AA03 | 1.000 | 1.00 | 0.01 | 78.56  | 1.000 |
| N03AB02 | 1.000 | 1.00 | 0.07 | 13.83  | 1.000 |
| N03AE01 | 0.708 | 1.16 | 0.51 | 2.66   | 0.728 |
| N03AF01 | 1.000 | 1.00 | 0.07 | 13.83  | 1.000 |
| N03AF02 | NA    | NA   | NA   | NA     | NA    |
| N03AF04 | 0.500 | Inf  | 0.03 | Inf    | 0.789 |
| N03AG01 | 0.507 | 0.60 | 0.09 | 3.09   | 0.604 |
| N03AX09 | 1.000 | 1.00 | 0.07 | 13.83  | 1.000 |
| N03AX11 | 0.625 | 2.00 | 0.10 | 118.26 | 0.680 |
| N03AX12 | 0.305 | 1.44 | 0.69 | 3.11   | 0.527 |
| N03AX14 | 0.164 | 2.02 | 0.70 | 6.59   | 0.524 |
| N03AX15 | 0.625 | 2.00 | 0.10 | 118.26 | 0.680 |
| N03AX16 | 0.717 | 1.09 | 0.66 | 1.82   | 0.734 |
| N03AX18 | 0.687 | 0.67 | 0.06 | 5.83   | 0.716 |
| N03AX22 | 0.500 | 0.00 | 0.00 | 39.00  | 0.789 |
| N03AX23 | 0.500 | 0.00 | 0.00 | 39.00  | 0.789 |
| N04AA02 | 1.000 | 1.00 | 0.07 | 13.83  | 1.000 |
| N04BA02 | 0.553 | 1.20 | 0.64 | 2.27   | 0.620 |
| N04BB01 | 1.000 | 1.00 | 0.01 | 78.56  | 1.000 |
| N04BC04 | 0.031 | 0.00 | 0.00 | 1.09   | 0.844 |
| N04BC05 | 0.753 | 0.80 | 0.16 | 3.73   | 0.766 |
| N04BC09 | 1.000 | 1.00 | 0.01 | 78.56  | 1.000 |
| N04BD02 | 0.478 | 1.43 | 0.49 | 4.47   | 0.585 |
| N04BD03 | 0.500 | Inf  | 0.03 | Inf    | 0.789 |
| N05AA01 | NA    | NA   | NA   | NA     | NA    |
| N05AA02 | 0.250 | Inf  | 0.19 | Inf    | 0.803 |
| N05AD01 | 0.790 | 0.86 | 0.24 | 2.99   | 0.797 |

|         |       |      |      |        |       |
|---------|-------|------|------|--------|-------|
| N05AF05 | 0.500 | 0.00 | 0.00 | 39.00  | 0.789 |
| N05AG02 | NA    | NA   | NA   | NA     | NA    |
| N05AH   | 0.125 | Inf  | 0.41 | Inf    | 0.820 |
| N05AH02 | NA    | NA   | NA   | NA     | NA    |
| N05AH03 | 0.726 | 1.34 | 0.22 | 9.15   | 0.744 |
| N05AH04 | 0.117 | 1.43 | 0.89 | 2.31   | 0.506 |
| N05AH06 | 0.500 | Inf  | 0.03 | Inf    | 0.789 |
| N05AL01 | 0.342 | 0.50 | 0.08 | 2.34   | 0.552 |
| N05AL03 | NA    | NA   | NA   | NA     | NA    |
| N05AL05 | NA    | NA   | NA   | NA     | NA    |
| N05AN01 | 1.000 | 1.00 | 0.07 | 13.83  | 1.000 |
| N05AX08 | 0.210 | 1.60 | 0.73 | 3.64   | 0.516 |
| N05AX12 | 1.000 | 1.00 | 0.01 | 78.56  | 1.000 |
| N05AX13 | 0.500 | Inf  | 0.03 | Inf    | 0.789 |
| N05BA01 | 0.478 | 0.70 | 0.22 | 2.04   | 0.585 |
| N05BA05 | 0.726 | 0.75 | 0.11 | 4.45   | 0.744 |
| N05BA06 | 0.106 | 0.77 | 0.55 | 1.07   | 0.503 |
| N05BA08 | 0.922 | 1.02 | 0.68 | 1.53   | 0.923 |
| N05BA09 | NA    | NA   | NA   | NA     | NA    |
| N05BA10 | 0.500 | Inf  | 0.03 | Inf    | 0.789 |
| N05BA12 | 0.108 | 0.28 | 0.03 | 1.50   | 0.557 |
| N05BA14 | NA    | NA   | NA   | NA     | NA    |
| N05BA51 | 0.218 | 4.01 | 0.40 | 197.95 | 0.577 |
| N05BB01 | 0.288 | 0.40 | 0.04 | 2.44   | 0.554 |
| N05CD06 | 0.105 | 1.64 | 0.87 | 3.16   | 0.510 |
| N05CD08 | 0.500 | 0.00 | 0.00 | 39.00  | 0.789 |
| N05CD09 | 0.500 | Inf  | 0.03 | Inf    | 0.789 |
| N05CD11 | NA    | NA   | NA   | NA     | NA    |
| N05CF01 | NA    | NA   | NA   | NA     | NA    |
| N05CF02 | 0.858 | 1.07 | 0.49 | 2.34   | 0.861 |
| N05CM02 | 0.547 | 1.50 | 0.35 | 7.28   | 0.622 |
| N06AA04 | 1.000 | 1.00 | 0.01 | 78.56  | 1.000 |
| N06AA09 | 0.627 | 1.29 | 0.42 | 4.10   | 0.668 |
| N06AB03 | 0.062 | 0.00 | 0.00 | 1.51   | 0.833 |
| N06AB04 | 0.844 | 0.92 | 0.38 | 2.21   | 0.847 |
| N06AB05 | 0.170 | 1.63 | 0.77 | 3.58   | 0.514 |
| N06AB06 | 0.697 | 0.90 | 0.52 | 1.56   | 0.719 |
| N06AB08 | 1.000 | 1.00 | 0.01 | 78.56  | 1.000 |
| N06AB10 | 0.284 | 0.71 | 0.36 | 1.37   | 0.522 |
| N06AX05 | 0.355 | 1.21 | 0.79 | 1.86   | 0.534 |
| N06AX12 | 0.625 | 0.50 | 0.01 | 9.62   | 0.680 |
| N06AX14 | 0.500 | 0.00 | 0.00 | 39.00  | 0.789 |
| N06AX16 | 0.547 | 0.66 | 0.14 | 2.82   | 0.622 |
| N06AX18 | 0.500 | Inf  | 0.03 | Inf    | 0.789 |
| N06AX21 | 1.000 | 1.00 | 0.48 | 2.10   | 1.000 |
| N06AX23 | 0.070 | 6.04 | 0.73 | 278.06 | 0.595 |

|         |       |      |      |       |       |
|---------|-------|------|------|-------|-------|
| N06AX26 | 0.288 | 2.51 | 0.41 | 26.45 | 0.554 |
| N06BX06 | 0.062 | 0.00 | 0.00 | 1.51  | 0.833 |
| N06DA02 | 0.276 | 1.51 | 0.68 | 3.47  | 0.523 |
| N06DA03 | 1.000 | 1.00 | 0.39 | 2.56  | 1.000 |
| N06DA04 | 0.625 | 0.50 | 0.01 | 9.62  | 0.680 |
| N06DX01 | 0.148 | 1.89 | 0.75 | 5.19  | 0.519 |
| N06DX02 | 0.250 | Inf  | 0.19 | Inf   | 0.803 |
| N07AA02 | 0.687 | 1.50 | 0.17 | 18.03 | 0.716 |
| N07AX01 | 0.500 | 0.00 | 0.00 | 39.00 | 0.789 |
| N07BA01 | NA    | NA   | NA   | NA    | NA    |
| N07BA03 | 0.500 | Inf  | 0.03 | Inf   | 0.789 |
| N07BC02 | NA    | NA   | NA   | NA    | NA    |
| N07CA01 | 0.305 | 1.44 | 0.69 | 3.11  | 0.527 |
| N07CA03 | 0.250 | 0.00 | 0.00 | 5.32  | 0.803 |
| N07XX06 | NA    | NA   | NA   | NA    | NA    |
| P01AB01 | 0.500 | 0.00 | 0.00 | 39.00 | 0.789 |
| P01AX06 | 0.500 | 0.00 | 0.00 | 39.00 | 0.789 |
| P01BA01 | 0.250 | 0.00 | 0.00 | 5.32  | 0.803 |
| P01BA02 | 0.422 | 1.61 | 0.46 | 6.27  | 0.565 |
| P01BB51 | NA    | NA   | NA   | NA    | NA    |
| R01AC02 | 0.500 | 0.00 | 0.00 | 39.00 | 0.789 |
| R01AC03 | NA    | NA   | NA   | NA    | NA    |
| R01AD   | 0.500 | Inf  | 0.03 | Inf   | 0.789 |
| R01AD05 | 1.000 | 1.00 | 0.39 | 2.56  | 1.000 |
| R01AD08 | 0.500 | Inf  | 0.03 | Inf   | 0.789 |
| R01AD09 | 0.207 | 0.57 | 0.20 | 1.46  | 0.521 |
| R01AD11 | 0.500 | Inf  | 0.03 | Inf   | 0.789 |
| R01AD12 | 0.698 | 0.85 | 0.36 | 2.01  | 0.720 |
| R01AD58 | NA    | NA   | NA   | NA    | NA    |
| R01AX03 | 0.500 | Inf  | 0.03 | Inf   | 0.789 |
| R02AA52 | NA    | NA   | NA   | NA    | NA    |
| R03AC03 | 0.342 | 0.50 | 0.08 | 2.34  | 0.552 |
| R03AC12 | 0.250 | 0.00 | 0.00 | 5.32  | 0.803 |
| R03AC13 | 0.500 | 0.00 | 0.00 | 39.00 | 0.789 |
| R03AC18 | 0.687 | 0.67 | 0.06 | 5.83  | 0.716 |
| R03AK   | 0.283 | 0.61 | 0.22 | 1.60  | 0.528 |
| R03AK06 | 0.372 | 1.39 | 0.64 | 3.12  | 0.543 |
| R03AK08 | 0.062 | 0.43 | 0.15 | 1.12  | 0.525 |
| R03AK10 | 0.831 | 0.91 | 0.34 | 2.37  | 0.835 |
| R03AK11 | 1.000 | 1.00 | 0.07 | 13.83 | 1.000 |
| R03AL02 | 0.288 | 2.51 | 0.41 | 26.45 | 0.554 |
| R03AL03 | 0.452 | 2.00 | 0.29 | 22.23 | 0.588 |
| R03AL04 | 0.084 | 1.76 | 0.89 | 3.61  | 0.513 |
| R03AL05 | 0.452 | 0.50 | 0.04 | 3.49  | 0.588 |
| R03AL06 | 0.330 | 1.68 | 0.55 | 5.64  | 0.539 |
| R03AL08 | 0.125 | 0.00 | 0.00 | 2.42  | 0.820 |

|         |       |      |      |        |       |
|---------|-------|------|------|--------|-------|
| R03AL09 | 0.062 | 0.00 | 0.00 | 1.51   | 0.833 |
| R03BA02 | 0.554 | 0.78 | 0.32 | 1.87   | 0.621 |
| R03BA05 | 0.625 | 2.00 | 0.10 | 118.26 | 0.680 |
| R03BA08 | NA    | NA   | NA   | NA     | NA    |
| R03BB04 | 0.091 | 0.64 | 0.36 | 1.11   | 0.508 |
| R03BB05 | 0.164 | 2.02 | 0.70 | 6.59   | 0.524 |
| R03BB06 | 0.452 | 0.50 | 0.04 | 3.49   | 0.588 |
| R03BB07 | 0.500 | Inf  | 0.03 | Inf    | 0.789 |
| R03DA04 | NA    | NA   | NA   | NA     | NA    |
| R03DC03 | 0.299 | 0.55 | 0.14 | 1.85   | 0.536 |
| R03DX07 | 1.000 | 1.00 | 0.01 | 78.56  | 1.000 |
| R05CB01 | 0.113 | 0.46 | 0.14 | 1.30   | 0.525 |
| R05CB03 | 0.726 | 1.34 | 0.22 | 9.15   | 0.744 |
| R05CB06 | 1.000 | 1.00 | 0.01 | 78.56  | 1.000 |
| R05CB10 | NA    | NA   | NA   | NA     | NA    |
| R05DA04 | 0.179 | 0.33 | 0.03 | 1.86   | 0.551 |
| R05DA09 | 0.500 | 0.00 | 0.00 | 39.00  | 0.789 |
| R05DB21 | 1.000 | 1.00 | 0.01 | 78.56  | 1.000 |
| R05FA02 | 0.500 | Inf  | 0.03 | Inf    | 0.789 |
| R06AA59 | NA    | NA   | NA   | NA     | NA    |
| R06AB02 | 0.478 | 1.43 | 0.49 | 4.47   | 0.585 |
| R06AD07 | NA    | NA   | NA   | NA     | NA    |
| R06AE07 | 0.091 | 0.46 | 0.16 | 1.21   | 0.523 |
| R06AE09 | 1.000 | 1.00 | 0.01 | 78.56  | 1.000 |
| R06AE57 | NA    | NA   | NA   | NA     | NA    |
| R06AE92 | 0.500 | 0.00 | 0.00 | 39.00  | 0.789 |
| R06AX22 | 0.879 | 1.05 | 0.54 | 2.03   | 0.880 |
| R06AX26 | 1.000 | 1.00 | 0.01 | 78.56  | 1.000 |
| R06AX27 | 0.125 | Inf  | 0.41 | Inf    | 0.820 |
| R06AX28 | 1.000 | 1.00 | 0.01 | 78.56  | 1.000 |
| R06AX29 | 0.838 | 1.09 | 0.44 | 2.75   | 0.841 |
| S01AA04 | 0.500 | Inf  | 0.03 | Inf    | 0.789 |
| S01AA12 | 1.000 | 1.00 | 0.13 | 7.49   | 1.000 |
| S01AA30 | NA    | NA   | NA   | NA     | NA    |
| S01AE01 | 0.250 | Inf  | 0.19 | Inf    | 0.803 |
| S01AE07 | 0.500 | 0.00 | 0.00 | 39.00  | 0.789 |
| S01BA01 | 0.124 | 5.02 | 0.56 | 237.95 | 0.585 |
| S01BA02 | NA    | NA   | NA   | NA     | NA    |
| S01BA04 | 0.500 | Inf  | 0.03 | Inf    | 0.789 |
| S01BA07 | 0.250 | Inf  | 0.19 | Inf    | 0.803 |
| S01BA13 | 0.500 | Inf  | 0.03 | Inf    | 0.789 |
| S01BC03 | NA    | NA   | NA   | NA     | NA    |
| S01BC05 | 1.000 | 1.00 | 0.01 | 78.56  | 1.000 |
| S01CA01 | 1.000 | 1.00 | 0.19 | 5.39   | 1.000 |
| S01EA05 | 0.031 | Inf  | 0.92 | Inf    | 0.844 |
| S01EC01 | 0.500 | Inf  | 0.03 | Inf    | 0.789 |

|         |       |      |      |       |       |
|---------|-------|------|------|-------|-------|
| S01EC03 | 0.500 | Inf  | 0.03 | Inf   | 0.789 |
| S01EC04 | 0.579 | 0.71 | 0.18 | 2.62  | 0.639 |
| S01EC54 | 0.452 | 0.50 | 0.04 | 3.49  | 0.588 |
| S01ED01 | 1.000 | 1.00 | 0.19 | 5.39  | 1.000 |
| S01ED05 | NA    | NA   | NA   | NA    | NA    |
| S01ED51 | 0.177 | 0.66 | 0.34 | 1.25  | 0.511 |
| S01EE01 | 0.357 | 0.70 | 0.30 | 1.57  | 0.539 |
| S01EE03 | 0.813 | 0.89 | 0.30 | 2.61  | 0.819 |
| S01EE04 | 0.452 | 0.50 | 0.04 | 3.49  | 0.588 |
| S01EE05 | NA    | NA   | NA   | NA    | NA    |
| S01FA01 | 0.500 | Inf  | 0.03 | Inf   | 0.789 |
| S01FA06 | 0.500 | 0.00 | 0.00 | 39.00 | 0.789 |
| S01GX01 | NA    | NA   | NA   | NA    | NA    |
| S01GX02 | 0.579 | 0.71 | 0.18 | 2.62  | 0.639 |
| S01GX04 | 1.000 | 1.00 | 0.01 | 78.56 | 1.000 |
| S01GX07 | 0.452 | 2.00 | 0.29 | 22.23 | 0.588 |
| S01GX08 | 1.000 | 1.00 | 0.07 | 13.83 | 1.000 |
| S01GX09 | 0.500 | 0.00 | 0.00 | 39.00 | 0.789 |
| S01GX10 | NA    | NA   | NA   | NA    | NA    |
| S01XA03 | NA    | NA   | NA   | NA    | NA    |
| S01XA20 | 0.218 | 0.25 | 0.01 | 2.53  | 0.577 |
| S02AA15 | 0.500 | 0.00 | 0.00 | 39.00 | 0.789 |
| S02BA08 | 0.500 | Inf  | 0.03 | Inf   | 0.789 |
| S02CA05 | 1.000 | 1.00 | 0.01 | 78.56 | 1.000 |
| S02CA06 | 0.250 | 0.00 | 0.00 | 5.32  | 0.803 |
| S03CA01 | 0.500 | Inf  | 0.03 | Inf   | 0.789 |
| S03CA04 | 0.753 | 0.80 | 0.16 | 3.73  | 0.766 |
| V03AE01 | 0.386 | 1.76 | 0.44 | 8.22  | 0.557 |
| V03AE02 | 1.000 | 1.00 | 0.19 | 5.39  | 1.000 |
| V03AE03 | 0.625 | 0.50 | 0.01 | 9.62  | 0.680 |
| V03AE05 | 0.374 | 0.33 | 0.01 | 4.15  | 0.586 |
| V03AE07 | 0.125 | 0.00 | 0.00 | 2.42  | 0.820 |
| V03AF03 | 0.374 | 0.33 | 0.01 | 4.15  | 0.586 |
| V03AF04 | NA    | NA   | NA   | NA    | NA    |

INF. INFINITE; NA. NO ANSWER; OR. ODDS RATIO; P. VALUE. STATISTICAL SIGNIFICANCE

**Table S2** Propensity score matching analysis of Subgroup of ATC. Lower and upper limits of the 95% confidence interval for the Odds Ratio.

| ATC CODE | DRUG<br>P.VALUE | OR   | LOWER LIMIT 95% CI | UPPER LIMIT 95% CI | POWER |
|----------|-----------------|------|--------------------|--------------------|-------|
| A01AB    | 1.000           | 1.00 | 0.01               | 78.56              | 1.000 |
| A01AC    | 0.250           | 0.00 | 0.00               | 5.32               | 0.803 |
| A02AD    | 0.500           | Inf  | 0.03               | Inf                | 0.789 |
| A02AH    | 0.500           | 0.00 | 0.00               | 39.00              | 0.789 |
| A02BA    | 0.803           | 1.14 | 0.36               | 3.73               | 0.809 |
| A02BC    | 0.257           | 1.13 | 0.91               | 1.41               | 0.512 |
| A02BD    | NA              | NA   | NA                 | NA                 | NA    |
| A02BX    | 1.000           | 1.00 | 0.01               | 78.56              | 1.000 |
| A03AA    | 0.726           | 1.34 | 0.22               | 9.15               | 0.744 |
| A03AB    | 0.500           | 0.00 | 0.00               | 39.00              | 0.789 |
| A03AX    | 0.125           | Inf  | 0.41               | Inf                | 0.820 |
| A03BB    | 0.124           | 0.20 | 0.00               | 1.79               | 0.585 |
| A03FA    | 0.730           | 0.92 | 0.57               | 1.49               | 0.745 |
| A04AD    | 0.753           | 0.80 | 0.16               | 3.73               | 0.766 |
| A05AA    | 0.048           | 0.33 | 0.08               | 1.09               | 0.541 |
| A06AA    | 0.374           | 0.33 | 0.01               | 4.15               | 0.586 |
| A06AB    | 0.250           | 0.00 | 0.00               | 5.32               | 0.803 |
| A06AC    | 0.547           | 0.66 | 0.14               | 2.82               | 0.622 |
| A06AD    | 0.767           | 0.91 | 0.48               | 1.72               | 0.777 |
| A06AG    | 0.250           | 0.00 | 0.00               | 5.32               | 0.803 |
| A06AX    | NA              | NA   | NA                 | NA                 | NA    |
| A07AA    | 0.661           | 0.82 | 0.30               | 2.18               | 0.692 |
| A07CA    | <0.001          | 0.15 | 0.03               | 0.53               | 0.591 |
| A07DA    | 1.000           | 1.00 | 0.01               | 78.56              | 1.000 |
| A07EA    | NA              | NA   | NA                 | NA                 | NA    |
| A07EC    | 1.000           | 1.00 | 0.19               | 5.39               | 1.000 |
| A07FA    | NA              | NA   | NA                 | NA                 | NA    |
| A07XA    | 1.000           | 1.00 | 0.01               | 78.56              | 1.000 |
| A09AA    | 1.000           | 1.00 | 0.13               | 7.49               | 1.000 |
| A10AB    | 0.029           | 2.04 | 1.03               | 4.24               | 0.517 |
| A10AC    | 0.500           | 0.00 | 0.00               | 39.00              | 0.789 |
| A10AD    | 0.288           | 2.51 | 0.41               | 26.45              | 0.554 |
| A10AE    | 0.337           | 1.23 | 0.79               | 1.93               | 0.530 |
| A10BA    | 0.304           | 0.82 | 0.56               | 1.21               | 0.522 |
| A10BB    | 0.164           | 2.02 | 0.70               | 6.59               | 0.524 |
| A10BD    | 0.736           | 1.08 | 0.68               | 1.73               | 0.750 |
| A10BF    | NA              | NA   | NA                 | NA                 | NA    |
| A10BH    | 0.397           | 1.23 | 0.74               | 2.06               | 0.548 |
| A10BJ    | 1.000           | 1.00 | 0.13               | 7.49               | 1.000 |
| A10BK    | 0.091           | 2.17 | 0.83               | 6.33               | 0.523 |
| A10BX    | 1.000           | 1.00 | 0.42               | 2.36               | 1.000 |
| A11CA    | 0.250           | Inf  | 0.19               | Inf                | 0.803 |



|       |        |      |      |        |        |
|-------|--------|------|------|--------|--------|
| A11CC | 0.953  | 1.01 | 0.79 | 1.28   | 0.953  |
| A11DA | 0.625  | 2.00 | 0.10 | 118.26 | 0.680  |
| A11DB | 0.250  | 0.00 | 0.00 | 5.32   | 0.803  |
| A11EX | NA     | NA   | NA   | NA     | NA     |
| A11GA | 0.500  | 0.00 | 0.00 | 39.00  | 0.789  |
| A11HA | 1.000  | 1.00 | 0.13 | 7.49   | 1.000  |
| A12AA | 0.356  | 0.63 | 0.21 | 1.80   | 0.543  |
| A12AX | 0.615  | 0.92 | 0.65 | 1.30   | 0.658  |
| A12BA | 0.547  | 1.50 | 0.35 | 7.28   | 0.622  |
| A12CC | 0.687  | 0.67 | 0.06 | 5.83   | 0.716  |
| A12CX | 0.250  | Inf  | 0.19 | Inf    | 0.803  |
| A15ZZ | 0.500  | Inf  | 0.03 | Inf    | 0.789  |
| B01AA | 0.094  | 1.37 | 0.93 | 2.03   | 0.504  |
| B01AB | <0.001 | 0.12 | 0.07 | 0.20   | <0.001 |
| B01AC | 0.070  | 1.25 | 0.97 | 1.62   | 0.502  |
| B01AD | 0.500  | 0.00 | 0.00 | 39.00  | 0.789  |
| B01AE | 1.000  | 1.00 | 0.27 | 3.76   | 1.000  |
| B01AF | 0.835  | 1.04 | 0.68 | 1.61   | 0.838  |
| B01AX | NA     | NA   | NA   | NA     | NA     |
| B02AA | 0.500  | Inf  | 0.03 | Inf    | 0.789  |
| B03AA | 0.249  | 1.28 | 0.83 | 1.98   | 0.514  |
| B03AB | 0.838  | 1.09 | 0.44 | 2.75   | 0.841  |
| B03BA | 0.210  | 1.34 | 0.83 | 2.17   | 0.510  |
| B03BB | 0.001  | 2.32 | 1.36 | 4.08   | 0.520  |
| B05BB | 0.250  | 0.00 | 0.00 | 5.32   | 0.803  |
| C01AA | 0.011  | 3.81 | 1.20 | 15.84  | 0.553  |
| C01BC | 1.000  | 1.00 | 0.13 | 7.49   | 1.000  |
| C01BD | 1.000  | 1.00 | 0.19 | 5.39   | 1.000  |
| C01CA | 0.500  | Inf  | 0.03 | Inf    | 0.789  |
| C01DA | 0.815  | 0.95 | 0.58 | 1.54   | 0.820  |
| C01EB | 0.538  | 1.31 | 0.52 | 3.35   | 0.612  |
| C02AC | 0.500  | Inf  | 0.03 | Inf    | 0.789  |
| C02CA | 0.177  | 1.52 | 0.80 | 2.96   | 0.511  |
| C02DB | 0.500  | 0.00 | 0.00 | 39.00  | 0.789  |
| C02DC | NA     | NA   | NA   | NA     | NA     |
| C03AA | 0.698  | 1.17 | 0.50 | 2.79   | 0.720  |
| C03BA | 0.698  | 1.17 | 0.50 | 2.79   | 0.720  |
| C03CA | 0.168  | 1.21 | 0.91 | 1.60   | 0.504  |
| C03DA | 0.459  | 1.20 | 0.72 | 2.03   | 0.571  |
| C03EA | 0.646  | 1.25 | 0.44 | 3.68   | 0.681  |
| C04AD | 0.208  | 2.01 | 0.62 | 7.55   | 0.528  |
| C05AA | NA     | NA   | NA   | NA     | NA     |
| C05AE | 0.125  | 0.00 | 0.00 | 2.42   | 0.820  |
| C05AX | 0.500  | 0.00 | 0.00 | 39.00  | 0.789  |
| C05BX | 0.500  | 0.00 | 0.00 | 39.00  | 0.789  |
| C05CA | 0.125  | 0.00 | 0.00 | 2.42   | 0.820  |

|       |       |      |      |        |       |
|-------|-------|------|------|--------|-------|
| C07AA | 0.605 | 0.75 | 0.21 | 2.47   | 0.654 |
| C07AB | 0.773 | 1.04 | 0.78 | 1.40   | 0.782 |
| C07AG | 0.058 | 1.70 | 0.95 | 3.11   | 0.510 |
| C07BB | NA    | NA   | NA   | NA     | NA    |
| C07CB | 0.250 | Inf  | 0.19 | Inf    | 0.803 |
| C08CA | 0.812 | 0.96 | 0.70 | 1.33   | 0.817 |
| C08DA | 0.687 | 0.67 | 0.06 | 5.83   | 0.716 |
| C08DB | 0.386 | 1.76 | 0.44 | 8.22   | 0.557 |
| C09AA | 0.209 | 0.84 | 0.63 | 1.11   | 0.507 |
| C09BA | 0.032 | 1.64 | 1.02 | 2.68   | 0.508 |
| C09BB | 1.000 | 1.00 | 0.23 | 4.37   | 1.000 |
| C09CA | 0.656 | 1.08 | 0.75 | 1.56   | 0.687 |
| C09DA | 0.536 | 0.88 | 0.57 | 1.35   | 0.608 |
| C09DB | 0.661 | 0.82 | 0.30 | 2.18   | 0.692 |
| C09DX | 0.399 | 1.34 | 0.65 | 2.85   | 0.550 |
| C09XA | 0.625 | 2.00 | 0.10 | 118.26 | 0.680 |
| C10AA | 0.013 | 1.32 | 1.05 | 1.65   | 0.502 |
| C10AB | 0.323 | 1.51 | 0.63 | 3.79   | 0.533 |
| C10AC | 1.000 | 1.00 | 0.13 | 7.49   | 1.000 |
| C10AX | 0.613 | 1.19 | 0.58 | 2.50   | 0.657 |
| C10BA | 0.050 | 0.54 | 0.27 | 1.04   | 0.513 |
| C10BX | 0.031 | Inf  | 0.92 | Inf    | 0.844 |
| D01AC | 0.863 | 0.94 | 0.44 | 2.00   | 0.865 |
| D01AE | 0.757 | 0.91 | 0.46 | 1.76   | 0.769 |
| D01BA | NA    | NA   | NA   | NA     | NA    |
| D03BA | 0.374 | 3.01 | 0.24 | 158.05 | 0.586 |
| D05AX | 0.034 | 3.71 | 0.97 | 20.78  | 0.554 |
| D05BB | 0.250 | Inf  | 0.19 | Inf    | 0.803 |
| D05BX | NA    | NA   | NA   | NA     | NA    |
| D06AX | 0.117 | 0.40 | 0.09 | 1.38   | 0.534 |
| D06BA | 0.062 | Inf  | 0.66 | Inf    | 0.833 |
| D06BB | NA    | NA   | NA   | NA     | NA    |
| D06BX | 1.000 | 1.00 | 0.01 | 78.56  | 1.000 |
| D07AA | 0.625 | 0.50 | 0.01 | 9.62   | 0.680 |
| D07AB | 1.000 | 1.00 | 0.01 | 78.56  | 1.000 |
| D07AC | 0.258 | 0.77 | 0.48 | 1.24   | 0.515 |
| D07AD | 0.554 | 0.78 | 0.32 | 1.87   | 0.621 |
| D07CA | NA    | NA   | NA   | NA     | NA    |
| D07CB | NA    | NA   | NA   | NA     | NA    |
| D07CC | 0.500 | Inf  | 0.03 | Inf    | 0.789 |
| D07XC | 0.625 | 0.50 | 0.01 | 9.62   | 0.680 |
| D09AA | 0.500 | Inf  | 0.03 | Inf    | 0.789 |
| D10AF | 1.000 | 1.00 | 0.01 | 78.56  | 1.000 |
| D10BA | NA    | NA   | NA   | NA     | NA    |
| D11AH | 0.627 | 0.78 | 0.24 | 2.36   | 0.668 |
| D11AX | 1.000 | 1.00 | 0.19 | 5.39   | 1.000 |

|       |       |      |      |        |       |
|-------|-------|------|------|--------|-------|
| G01AC | NA    | NA   | NA   | NA     | NA    |
| G01AF | 0.124 | 0.20 | 0.00 | 1.79   | 0.585 |
| G02BB | NA    | NA   | NA   | NA     | NA    |
| G02CB | NA    | NA   | NA   | NA     | NA    |
| G02CC | NA    | NA   | NA   | NA     | NA    |
| G03AA | NA    | NA   | NA   | NA     | NA    |
| G03AB | NA    | NA   | NA   | NA     | NA    |
| G03AC | NA    | NA   | NA   | NA     | NA    |
| G03AD | NA    | NA   | NA   | NA     | NA    |
| G03BA | 0.500 | Inf  | 0.03 | Inf    | 0.789 |
| G03CA | NA    | NA   | NA   | NA     | NA    |
| G03CX | NA    | NA   | NA   | NA     | NA    |
| G03DA | NA    | NA   | NA   | NA     | NA    |
| G03DC | NA    | NA   | NA   | NA     | NA    |
| G03FB | NA    | NA   | NA   | NA     | NA    |
| G03HA | 0.500 | Inf  | 0.03 | Inf    | 0.789 |
| G03HB | NA    | NA   | NA   | NA     | NA    |
| G03XC | NA    | NA   | NA   | NA     | NA    |
| G04BC | 0.500 | Inf  | 0.03 | Inf    | 0.789 |
| G04BD | 0.245 | 1.42 | 0.76 | 2.68   | 0.516 |
| G04BE | 0.374 | 0.33 | 0.01 | 4.15   | 0.586 |
| G04CA | 0.136 | 1.24 | 0.93 | 1.66   | 0.503 |
| G04CB | 0.774 | 1.20 | 0.30 | 5.00   | 0.783 |
| G04CX | 0.131 | 2.02 | 0.76 | 5.95   | 0.522 |
| H01BA | NA    | NA   | NA   | NA     | NA    |
| H01CB | 0.500 | 0.00 | 0.00 | 39.00  | 0.789 |
| H02AA | 1.000 | 1.00 | 0.01 | 78.56  | 1.000 |
| H02AB | 0.429 | 1.17 | 0.78 | 1.77   | 0.558 |
| H03AA | 0.227 | 0.81 | 0.57 | 1.16   | 0.510 |
| H03BB | 0.726 | 1.34 | 0.22 | 9.15   | 0.744 |
| H03CA | NA    | NA   | NA   | NA     | NA    |
| H04AA | 0.726 | 1.34 | 0.22 | 9.15   | 0.744 |
| H05AA | 0.625 | 2.00 | 0.10 | 118.26 | 0.680 |
| H05BA | NA    | NA   | NA   | NA     | NA    |
| H05BX | 0.507 | 1.67 | 0.32 | 10.80  | 0.604 |
| J01AA | 0.250 | 0.00 | 0.00 | 5.32   | 0.803 |
| J01CA | 0.858 | 0.94 | 0.43 | 2.04   | 0.861 |
| J01CE | NA    | NA   | NA   | NA     | NA    |
| J01CF | 0.218 | 0.25 | 0.01 | 2.53   | 0.577 |
| J01CR | 0.074 | 0.58 | 0.29 | 1.10   | 0.512 |
| J01DB | 0.500 | 0.00 | 0.00 | 39.00  | 0.789 |
| J01DC | 0.011 | 0.26 | 0.06 | 0.83   | 0.553 |
| J01DD | 0.844 | 0.92 | 0.38 | 2.21   | 0.847 |
| J01EE | 0.605 | 1.34 | 0.40 | 4.70   | 0.654 |
| J01FA | 0.001 | 0.44 | 0.25 | 0.75   | 0.519 |
| J01FF | 1.000 | 1.00 | 0.07 | 13.83  | 1.000 |

|       |       |      |      |        |       |
|-------|-------|------|------|--------|-------|
| J01GB | 0.500 | 0.00 | 0.00 | 39.00  | 0.789 |
| J01MA | 0.039 | 0.62 | 0.37 | 1.00   | 0.508 |
| J01XE | 0.726 | 1.34 | 0.22 | 9.15   | 0.744 |
| J01XX | 0.646 | 0.87 | 0.45 | 1.67   | 0.680 |
| J02AC | 0.288 | 0.40 | 0.04 | 2.44   | 0.554 |
| J04AB | NA    | NA   | NA   | NA     | NA    |
| J04AC | NA    | NA   | NA   | NA     | NA    |
| J05AB | 0.753 | 0.80 | 0.16 | 3.73   | 0.766 |
| J05AH | 0.500 | 0.00 | 0.00 | 39.00  | 0.789 |
| L01BA | 1.000 | 1.00 | 0.01 | 78.56  | 1.000 |
| L01BC | 0.625 | 0.50 | 0.01 | 9.62   | 0.680 |
| L01XX | 0.625 | 0.50 | 0.01 | 9.62   | 0.680 |
| L02AB | 1.000 | 1.00 | 0.01 | 78.56  | 1.000 |
| L02AE | 0.131 | 0.50 | 0.17 | 1.32   | 0.522 |
| L02BA | 1.000 | 1.00 | 0.01 | 78.56  | 1.000 |
| L02BB | 1.000 | 1.00 | 0.07 | 13.83  | 1.000 |
| L02BG | 1.000 | 1.00 | 0.19 | 5.39   | 1.000 |
| L04AA | 0.386 | 1.76 | 0.44 | 8.22   | 0.557 |
| L04AD | 0.039 | 7.05 | 0.90 | 318.27 | 0.604 |
| L04AX | 0.148 | 1.89 | 0.75 | 5.19   | 0.519 |
| M01AB | 1.000 | 1.00 | 0.13 | 7.49   | 1.000 |
| M01AC | 0.250 | 0.00 | 0.00 | 5.32   | 0.803 |
| M01AE | 0.096 | 0.67 | 0.40 | 1.10   | 0.507 |
| M01AG | NA    | NA   | NA   | NA     | NA    |
| M01AH | 0.342 | 2.01 | 0.43 | 12.46  | 0.552 |
| M01AX | 0.030 | 0.30 | 0.07 | 0.99   | 0.545 |
| M01CX | 0.250 | 0.00 | 0.00 | 5.32   | 0.803 |
| M02AA | 0.500 | 0.00 | 0.00 | 39.00  | 0.789 |
| M03BA | 0.500 | Inf  | 0.03 | Inf    | 0.789 |
| M03BX | 0.145 | 0.37 | 0.06 | 1.56   | 0.540 |
| M04AA | 0.018 | 1.46 | 1.06 | 2.03   | 0.504 |
| M04AC | 0.208 | 0.50 | 0.13 | 1.60   | 0.528 |
| M05BA | 1.000 | 1.00 | 0.44 | 2.28   | 1.000 |
| M05BB | 0.625 | 2.00 | 0.10 | 118.26 | 0.680 |
| M05BX | 0.866 | 1.06 | 0.51 | 2.21   | 0.868 |
| N01BA | NA    | NA   | NA   | NA     | NA    |
| N01BB | 1.000 | 1.00 | 0.19 | 5.39   | 1.000 |
| N01BX | 0.452 | 2.00 | 0.29 | 22.23  | 0.588 |
| N02AA | 0.113 | 2.19 | 0.77 | 7.06   | 0.525 |
| N02AB | 0.050 | 2.28 | 0.94 | 6.11   | 0.524 |
| N02AE | 0.374 | 0.33 | 0.01 | 4.15   | 0.586 |
| N02AJ | 0.056 | 0.70 | 0.48 | 1.02   | 0.504 |
| N02AX | 0.886 | 1.04 | 0.57 | 1.93   | 0.887 |
| N02BA | 0.500 | Inf  | 0.03 | Inf    | 0.789 |
| N02BB | 0.806 | 1.03 | 0.80 | 1.32   | 0.812 |
| N02BE | 0.448 | 1.09 | 0.87 | 1.35   | 0.565 |

|       |       |      |      |       |       |
|-------|-------|------|------|-------|-------|
| N02BG | 0.500 | 0.00 | 0.00 | 39.00 | 0.789 |
| N02CA | 0.625 | 0.50 | 0.01 | 9.62  | 0.680 |
| N02CC | 0.374 | 0.33 | 0.01 | 4.15  | 0.586 |
| N03AA | 0.452 | 2.00 | 0.29 | 22.23 | 0.588 |
| N03AB | 1.000 | 1.00 | 0.07 | 13.83 | 1.000 |
| N03AE | 0.708 | 1.16 | 0.51 | 2.66  | 0.728 |
| N03AF | 0.687 | 1.50 | 0.17 | 18.03 | 0.716 |
| N03AG | 0.507 | 0.60 | 0.09 | 3.09  | 0.604 |
| N03AX | 0.144 | 1.31 | 0.90 | 1.91  | 0.505 |
| N04AA | 1.000 | 1.00 | 0.07 | 13.83 | 1.000 |
| N04BA | 0.553 | 1.20 | 0.64 | 2.27  | 0.620 |
| N04BB | 1.000 | 1.00 | 0.01 | 78.56 | 1.000 |
| N04BC | 0.141 | 0.45 | 0.12 | 1.42  | 0.528 |
| N04BD | 0.356 | 1.58 | 0.56 | 4.84  | 0.543 |
| N05AA | 0.250 | Inf  | 0.19 | Inf   | 0.803 |
| N05AD | 0.790 | 0.86 | 0.24 | 2.99  | 0.797 |
| N05AF | 0.500 | 0.00 | 0.00 | 39.00 | 0.789 |
| N05AG | NA    | NA   | NA   | NA    | NA    |
| N05AH | 0.105 | 1.43 | 0.91 | 2.26  | 0.506 |
| N05AL | 0.342 | 0.50 | 0.08 | 2.34  | 0.552 |
| N05AN | 1.000 | 1.00 | 0.07 | 13.83 | 1.000 |
| N05AX | 0.170 | 1.63 | 0.77 | 3.58  | 0.514 |
| N05BA | 0.195 | 0.85 | 0.65 | 1.10  | 0.506 |
| N05BB | 0.288 | 0.40 | 0.04 | 2.44  | 0.554 |
| N05CD | 0.080 | 1.70 | 0.91 | 3.27  | 0.511 |
| N05CF | 0.858 | 1.07 | 0.49 | 2.34  | 0.861 |
| N05CM | 0.547 | 1.50 | 0.35 | 7.28  | 0.622 |
| N06AA | 0.646 | 1.25 | 0.44 | 3.68  | 0.681 |
| N06AB | 0.567 | 0.91 | 0.65 | 1.27  | 0.626 |
| N06AX | 0.015 | 1.44 | 1.06 | 1.95  | 0.504 |
| N06BX | 0.062 | 0.00 | 0.00 | 1.51  | 0.833 |
| N06DA | 0.496 | 1.21 | 0.68 | 2.17  | 0.588 |
| N06DX | 0.073 | 2.15 | 0.87 | 5.80  | 0.522 |
| N07AA | 0.687 | 1.50 | 0.17 | 18.03 | 0.716 |
| N07AX | 0.500 | 0.00 | 0.00 | 39.00 | 0.789 |
| N07BA | 0.500 | Inf  | 0.03 | Inf   | 0.789 |
| N07BC | NA    | NA   | NA   | NA    | NA    |
| N07CA | 0.506 | 1.26 | 0.61 | 2.62  | 0.594 |
| N07XX | NA    | NA   | NA   | NA    | NA    |
| P01AB | 0.500 | 0.00 | 0.00 | 39.00 | 0.789 |
| P01AX | 0.500 | 0.00 | 0.00 | 39.00 | 0.789 |
| P01BA | 0.605 | 1.34 | 0.40 | 4.70  | 0.654 |
| P01BB | NA    | NA   | NA   | NA    | NA    |
| R01AC | 0.500 | 0.00 | 0.00 | 39.00 | 0.789 |
| R01AD | 0.546 | 0.86 | 0.52 | 1.43  | 0.614 |
| R01AX | 0.500 | Inf  | 0.03 | Inf   | 0.789 |

|                                                                                  |       |      |      |        |       |
|----------------------------------------------------------------------------------|-------|------|------|--------|-------|
| R02AA                                                                            | NA    | NA   | NA   | NA     | NA    |
| R03AC                                                                            | 0.010 | 0.57 | 0.36 | 0.90   | 0.510 |
| R03AK                                                                            | 0.023 | 0.68 | 0.48 | 0.96   | 0.505 |
| R03AL                                                                            | 0.247 | 1.31 | 0.81 | 2.15   | 0.514 |
| R03BA                                                                            | 0.708 | 0.86 | 0.38 | 1.96   | 0.728 |
| R03BB                                                                            | 0.023 | 0.67 | 0.46 | 0.96   | 0.505 |
| R03DA                                                                            | 0.015 | 0.00 | 0.00 | 0.85   | 0.853 |
| R03DC                                                                            | 0.299 | 0.55 | 0.14 | 1.85   | 0.536 |
| R03DX                                                                            | 1.000 | 1.00 | 0.01 | 78.56  | 1.000 |
| R05CB                                                                            | 0.181 | 0.58 | 0.24 | 1.36   | 0.517 |
| R05DA                                                                            | 0.108 | 0.28 | 0.03 | 1.50   | 0.557 |
| R05DB                                                                            | 1.000 | 1.00 | 0.01 | 78.56  | 1.000 |
| R05FA                                                                            | 0.500 | Inf  | 0.03 | Inf    | 0.789 |
| R06AA                                                                            | NA    | NA   | NA   | NA     | NA    |
| R06AB                                                                            | 0.478 | 1.43 | 0.49 | 4.47   | 0.585 |
| R06AD                                                                            | NA    | NA   | NA   | NA     | NA    |
| R06AE                                                                            | 0.073 | 0.46 | 0.17 | 1.15   | 0.522 |
| R06AX                                                                            | 0.655 | 0.90 | 0.57 | 1.44   | 0.686 |
| S01AA                                                                            | 0.726 | 1.34 | 0.22 | 9.15   | 0.744 |
| S01AE                                                                            | 0.625 | 2.00 | 0.10 | 118.26 | 0.680 |
| S01BA                                                                            | 0.039 | 7.05 | 0.90 | 318.27 | 0.604 |
| S01BC                                                                            | 1.000 | 1.00 | 0.01 | 78.56  | 1.000 |
| S01CA                                                                            | 1.000 | 1.00 | 0.19 | 5.39   | 1.000 |
| S01EA                                                                            | 0.031 | Inf  | 0.92 | Inf    | 0.844 |
| S01EC                                                                            | 0.823 | 0.90 | 0.32 | 2.48   | 0.827 |
| S01ED                                                                            | 0.263 | 0.72 | 0.39 | 1.31   | 0.518 |
| S01EE                                                                            | 0.263 | 0.72 | 0.39 | 1.31   | 0.518 |
| S01FA                                                                            | 1.000 | 1.00 | 0.01 | 78.56  | 1.000 |
| S01GX                                                                            | 0.844 | 0.92 | 0.38 | 2.21   | 0.847 |
| S01XA                                                                            | 0.218 | 0.25 | 0.01 | 2.53   | 0.577 |
| S02AA                                                                            | 0.500 | 0.00 | 0.00 | 39.00  | 0.789 |
| S02BA                                                                            | 0.500 | Inf  | 0.03 | Inf    | 0.789 |
| S02CA                                                                            | 0.625 | 0.50 | 0.01 | 9.62   | 0.680 |
| S03CA                                                                            | 1.000 | 1.00 | 0.23 | 4.37   | 1.000 |
| V03AE                                                                            | 1.000 | 1.00 | 0.39 | 2.56   | 1.000 |
| V03AF                                                                            | 0.374 | 0.33 | 0.01 | 4.15   | 0.586 |
| INF. INFINITE; NA. NO ANSWER; OR. ODDS RATIO; P. VALUE. STATISTICAL SIGNIFICANCE |       |      |      |        |       |

**Table S3** Propensity score matching analysis of the main therapeutic group. Lower and upper limits of the 95% confidence interval for the Odds Ratio.

| ATC CODE | DRUG<br>P.VALUE | OR   | LOWER LIMIT<br>95% CI | UPPER LIMIT<br>95% CI | POWER |
|----------|-----------------|------|-----------------------|-----------------------|-------|
| A01      | 0.374           | 0.33 | 0.01                  | 4.15                  | 0.586 |
| A02      | 0.234           | 1.14 | 0.91                  | 1.41                  | 0.509 |
| A03      | 0.594           | 0.89 | 0.57                  | 1.39                  | 0.644 |
| A04      | 0.753           | 0.80 | 0.16                  | 3.73                  | 0.766 |
| A05      | 0.048           | 0.33 | 0.08                  | 1.09                  | 0.541 |
| A06      | 0.302           | 0.76 | 0.44                  | 1.31                  | 0.523 |
| A07      | 0.033           | 0.53 | 0.28                  | 0.99                  | 0.513 |
| A09      | 1.000           | 1.00 | 0.13                  | 7.49                  | 1.000 |
| A10      | 0.255           | 1.16 | 0.89                  | 1.49                  | 0.512 |
| A11      | 1.000           | 1.00 | 0.79                  | 1.27                  | 1.000 |
| A12      | 0.531           | 0.91 | 0.66                  | 1.25                  | 0.606 |
| A15      | 0.500           | Inf  | 0.03                  | Inf                   | 0.789 |
| B01      | 0.160           | 0.86 | 0.69                  | 1.07                  | 0.503 |
| B02      | 0.500           | Inf  | 0.03                  | Inf                   | 0.789 |
| B03      | <0.001          | 1.68 | 1.25                  | 2.26                  | 0.507 |
| B05      | 0.250           | 0.00 | 0.00                  | 5.32                  | 0.803 |
| C01      | 0.169           | 1.31 | 0.88                  | 1.98                  | 0.506 |
| C02      | 0.137           | 1.58 | 0.83                  | 3.06                  | 0.510 |
| C03      | 0.264           | 1.15 | 0.89                  | 1.48                  | 0.514 |
| C04      | 0.208           | 2.01 | 0.62                  | 7.55                  | 0.528 |
| C05      | 0.004           | 0.00 | 0.00                  | 0.58                  | 0.868 |
| C07      | 0.242           | 1.17 | 0.89                  | 1.52                  | 0.511 |
| C08      | 0.939           | 0.99 | 0.72                  | 1.35                  | 0.939 |
| C09      | 0.828           | 1.02 | 0.82                  | 1.27                  | 0.832 |
| C10      | 0.082           | 1.21 | 0.97                  | 1.50                  | 0.501 |
| D01      | 0.810           | 0.94 | 0.57                  | 1.56                  | 0.816 |
| D03      | 0.374           | 3.01 | 0.24                  | 158.05                | 0.586 |
| D05      | 0.034           | 3.71 | 0.97                  | 20.78                 | 0.554 |
| D06      | 0.661           | 0.82 | 0.30                  | 2.18                  | 0.692 |
| D07      | 0.270           | 0.80 | 0.53                  | 1.21                  | 0.516 |
| D09      | 0.500           | Inf  | 0.03                  | Inf                   | 0.789 |
| D10      | 1.000           | 1.00 | 0.01                  | 78.56                 | 1.000 |
| D11      | 0.838           | 0.92 | 0.36                  | 2.28                  | 0.841 |
| G01      | 0.124           | 0.20 | 0.00                  | 1.79                  | 0.585 |
| G02      | NA              | NA   | NA                    | NA                    | NA    |
| G03      | 0.250           | Inf  | 0.19                  | Inf                   | 0.803 |
| G04      | 0.100           | 1.24 | 0.95                  | 1.62                  | 0.502 |
| H01      | 0.500           | 0.00 | 0.00                  | 39.00                 | 0.789 |
| H02      | 0.375           | 1.19 | 0.79                  | 1.80                  | 0.540 |
| H03      | 0.272           | 0.83 | 0.58                  | 1.17                  | 0.516 |
| H04      | 0.726           | 1.34 | 0.22                  | 9.15                  | 0.744 |

|                                                                                  |        |      |      |       |       |
|----------------------------------------------------------------------------------|--------|------|------|-------|-------|
| H05                                                                              | 0.386  | 1.76 | 0.44 | 8.22  | 0.557 |
| J01                                                                              | <0.001 | 0.53 | 0.40 | 0.70  | 0.510 |
| J02                                                                              | 0.288  | 0.40 | 0.04 | 2.44  | 0.554 |
| J04                                                                              | NA     | NA   | NA   | NA    | NA    |
| J05                                                                              | 0.547  | 0.66 | 0.14 | 2.82  | 0.622 |
| L01                                                                              | 0.507  | 0.60 | 0.09 | 3.09  | 0.604 |
| L02                                                                              | 0.224  | 0.64 | 0.29 | 1.37  | 0.517 |
| L04                                                                              | 0.095  | 1.80 | 0.86 | 3.89  | 0.514 |
| M01                                                                              | 0.050  | 0.66 | 0.43 | 1.02  | 0.506 |
| M02                                                                              | 0.500  | 0.00 | 0.00 | 39.00 | 0.789 |
| M03                                                                              | 0.265  | 0.50 | 0.11 | 1.87  | 0.536 |
| M04                                                                              | 0.015  | 1.47 | 1.06 | 2.03  | 0.504 |
| M05                                                                              | 0.800  | 1.07 | 0.63 | 1.83  | 0.806 |
| N01                                                                              | 0.605  | 1.34 | 0.40 | 4.70  | 0.654 |
| N02                                                                              | 0.824  | 1.03 | 0.82 | 1.28  | 0.828 |
| N03                                                                              | 0.162  | 1.26 | 0.90 | 1.77  | 0.505 |
| N04                                                                              | 0.697  | 1.11 | 0.64 | 1.92  | 0.719 |
| N05                                                                              | 0.955  | 0.99 | 0.79 | 1.25  | 0.955 |
| N06                                                                              | 0.120  | 1.20 | 0.95 | 1.54  | 0.502 |
| N07                                                                              | 0.444  | 1.27 | 0.66 | 2.48  | 0.566 |
| P01                                                                              | 1.000  | 1.00 | 0.33 | 3.08  | 1.000 |
| R01                                                                              | 0.551  | 0.87 | 0.52 | 1.43  | 0.617 |
| R02                                                                              | NA     | NA   | NA   | NA    | NA    |
| R03                                                                              | 0.009  | 0.71 | 0.55 | 0.93  | 0.503 |
| R05                                                                              | 0.103  | 0.57 | 0.27 | 1.17  | 0.513 |
| R06                                                                              | 0.390  | 0.85 | 0.57 | 1.26  | 0.544 |
| S01                                                                              | 0.144  | 0.78 | 0.54 | 1.10  | 0.504 |
| S02                                                                              | 0.687  | 0.67 | 0.06 | 5.83  | 0.716 |
| S03                                                                              | 1.000  | 1.00 | 0.23 | 4.37  | 1.000 |
| V03                                                                              | 0.698  | 0.85 | 0.36 | 2.01  | 0.720 |
| INF. INFINITE; NA. NO ANSWER; OR. ODDS RATIO; P. VALUE. STATISTICAL SIGNIFICANCE |        |      |      |       |       |
